# Supplementary material for: Resolution of chiral polyoxoanion [P2Mo18O62]6− with histidine
Source: Royal Society of Chemistry journal article supplement (doi:10.1039/c001160f), 2010-01-01
Supplement: c001160f.pdf [file c001160f.pdf]

## Supplementary Materials

### Resolution of Chiral polyoxoanion $[P_2Mo_{18}O_{62}]^{6-}$ with Histidine

Ding Liu, Hua-Qiao Tan, Wei-Lin Chen, Yang-Guang Li,\* En-Bo Wang\*

*Key Laboratory of Polyoxometalate Science of Ministry of Education, Department of Chemistry,*

*Northeast Normal University, Ren Min Street No.5268, Changchun, Jilin 130024, P. R. China.*

\*To whom correspondence should be addressed. E-mail: [wangeb889@nenu.edu.cn](mailto:wangeb889@nenu.edu.cn),

[liyig658@nenu.edu.cn](mailto:liyig658@nenu.edu.cn). Fax: +86- 431-85098787.

### **General methods and materials:**

All chemicals were commercially purchased and used without further purification. Elemental analyses (C, H, N) were performed on a Perkin-Elmer 2400 CHN elemental analyzer; P, Mo were analyzed on a PLASMA-SPEC(I) ICP atomic emission spectrometer. IR spectra were recorded in the range of 400 ~ 4000  $\text{cm}^{-1}$  on an Alpha Centaur FT/IR Spectrophotometer using KBr pellets. The UV-vis absorption spectra were recorded using a Hitachi UV-3010 spectrophotometer. TG analysis was performed on a Perkin-Elmer TGA7 instrument in flowing  $\text{N}_2$  with a heating rate of 10  $^\circ\text{C min}^{-1}$ . Solid-state CD spectra for compounds **1** were recorded using a JASCO J-810 spectrophotometer. Polarizing optical microscope measurements were performed using a Changfang XPV-400E polarized optical microscope.

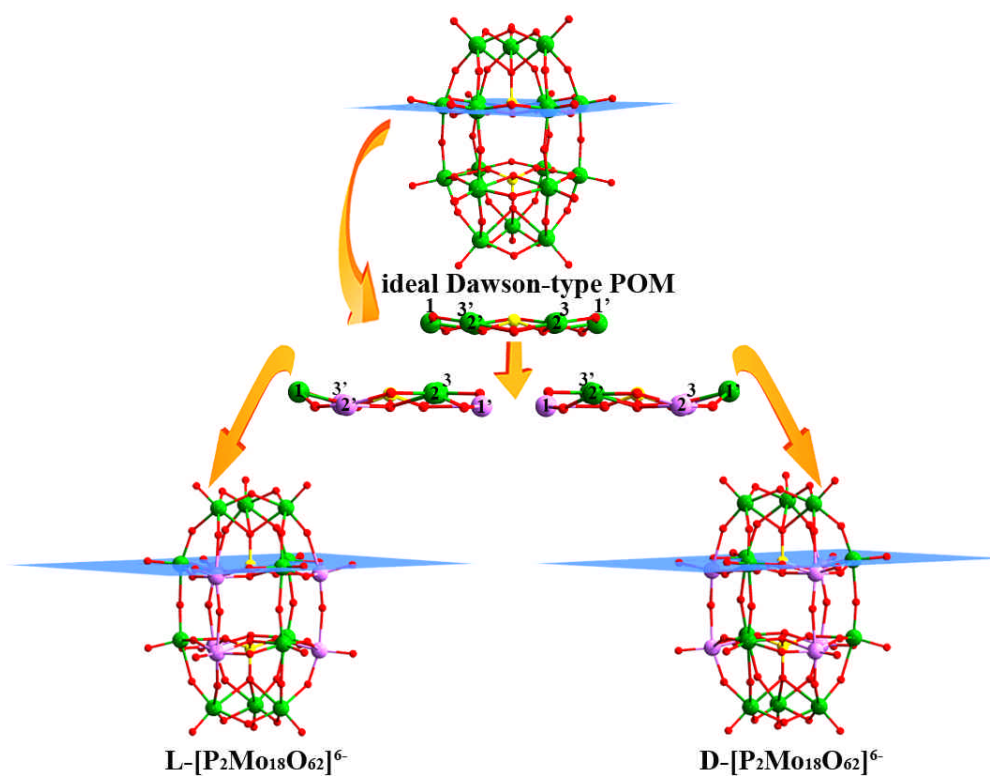

**Scheme S1** The  $L-[P_2Mo_{18}O_{62}]^{6-}$  and  $D-[P_2Mo_{18}O_{62}]^{6-}$  with  $D_3$  symmetry viewed as a ideal Dawson-type polyoxoanion by displacing two different sets of three Mo atoms in the ring.

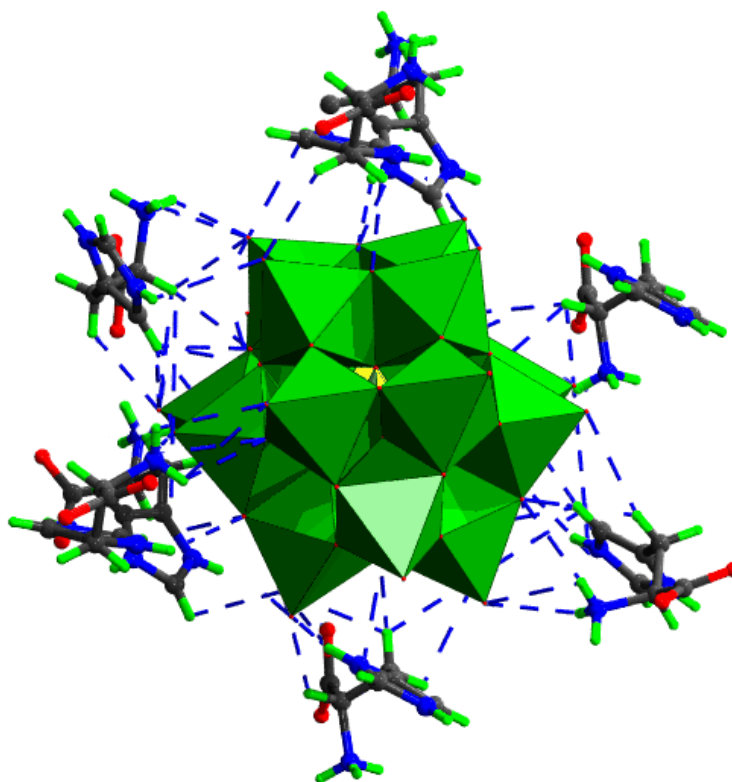

**Figure S1** Polyhedral and ball-and-stick representation of the H-bonding interactions between the  $[P_2Mo_{18}O_{62}]^{6-}$  polyoxoanions and histidine molecules in compound **1a**.

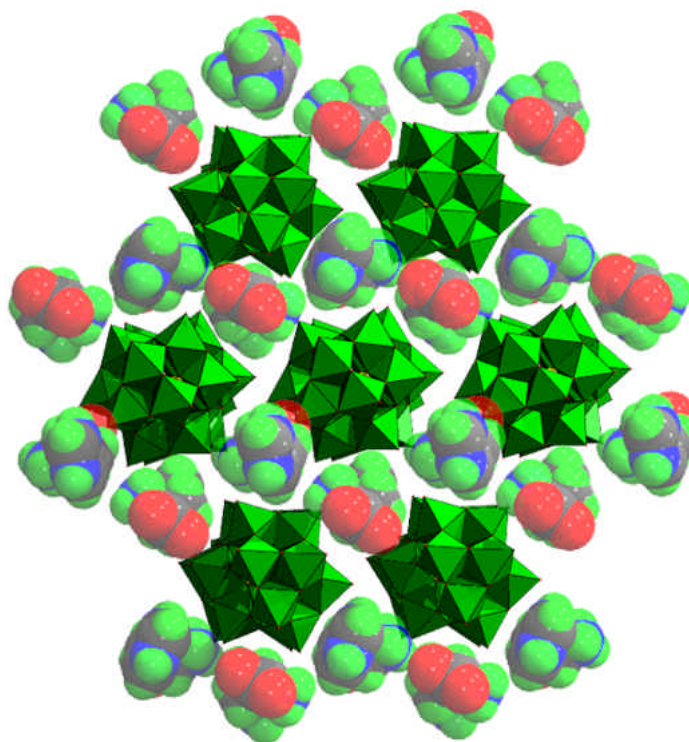

**Figure S2** Polyhedral and filling diagram representation of the 2D layer formed of  $[P_2Mo_{18}O_{62}]^{6-}$  polyoxoanion and L-histidine in compound **1a**.

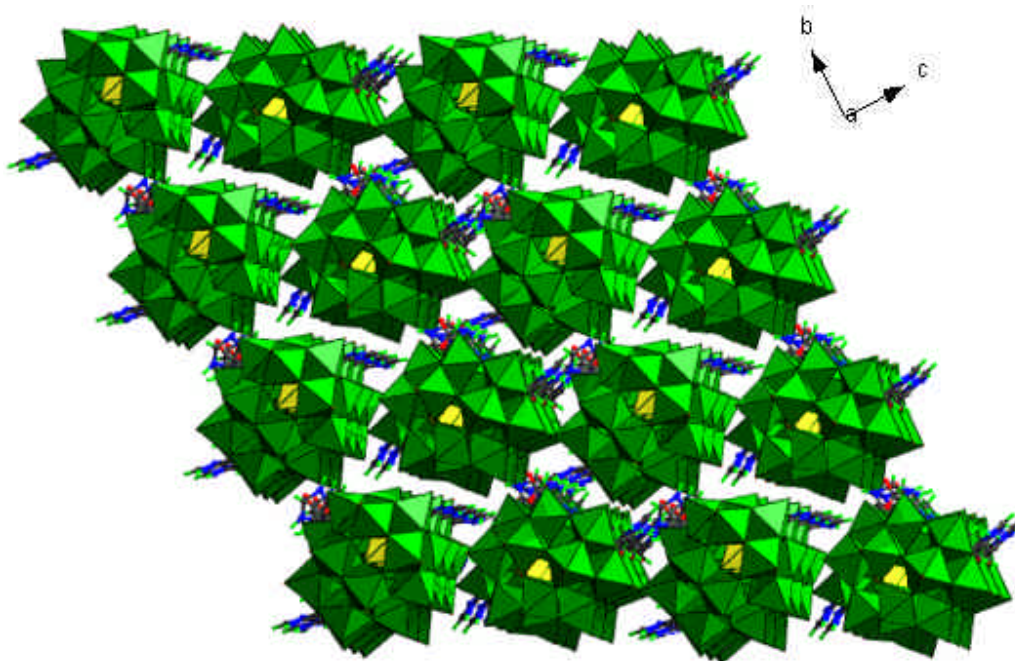

**Figure S3** Polyhedral and ball-and-stick representation of the 3D supramolecular structure of **1a** viewed along a axis

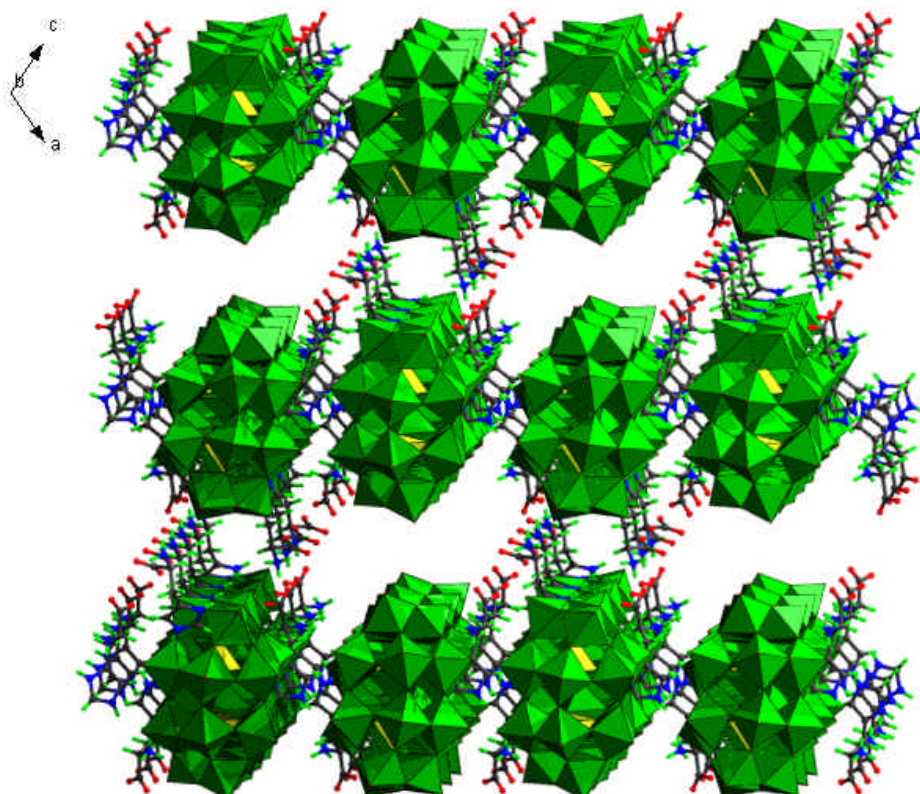

**Figure S4** Polyhedral and ball-and-stick representation of the 3D supramolecular structure of **1a** viewed along b axis

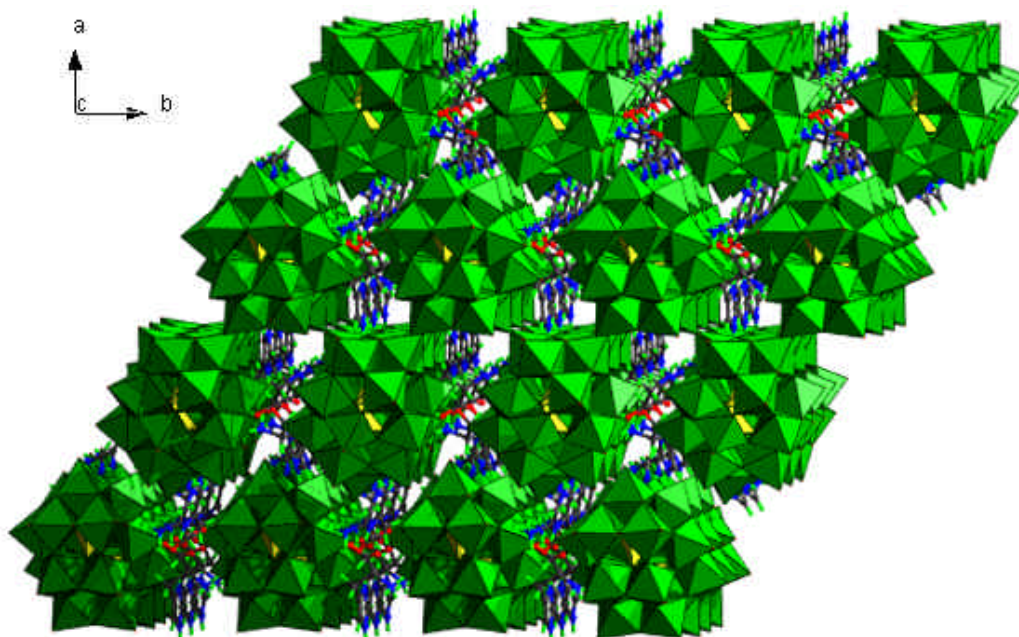

**Figure S5** Polyhedral and ball-and-stick representation of the 3D supramolecular structure of **1a** viewed along c axis

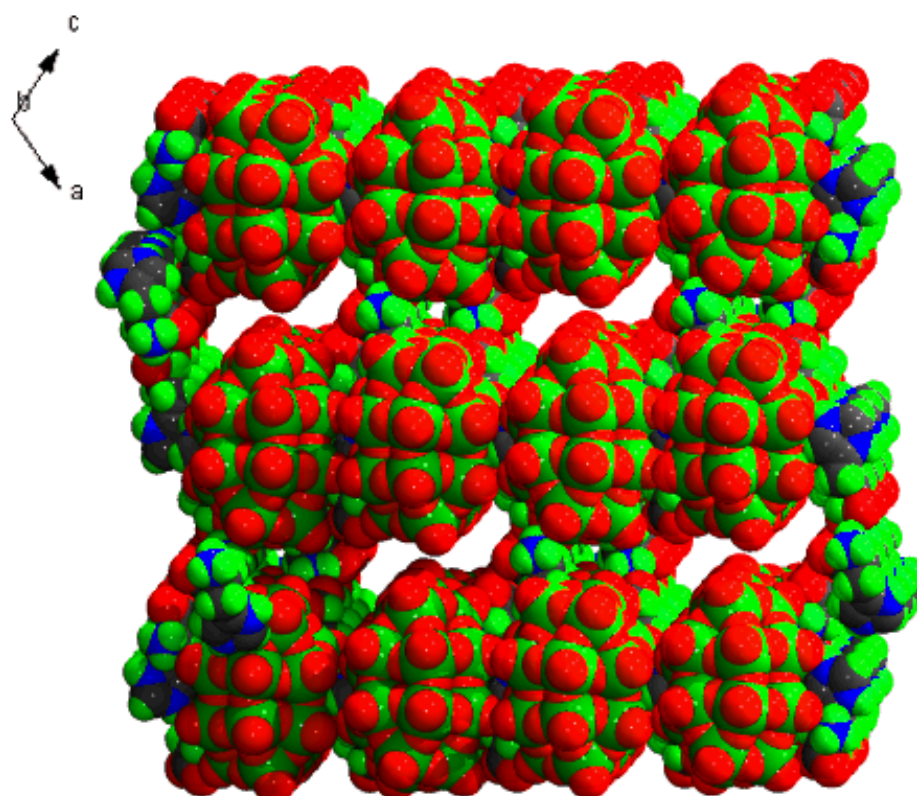

**Figure S6** A space-filling diagram representation of 3D supramolecular structure with channels in compound **1a**.

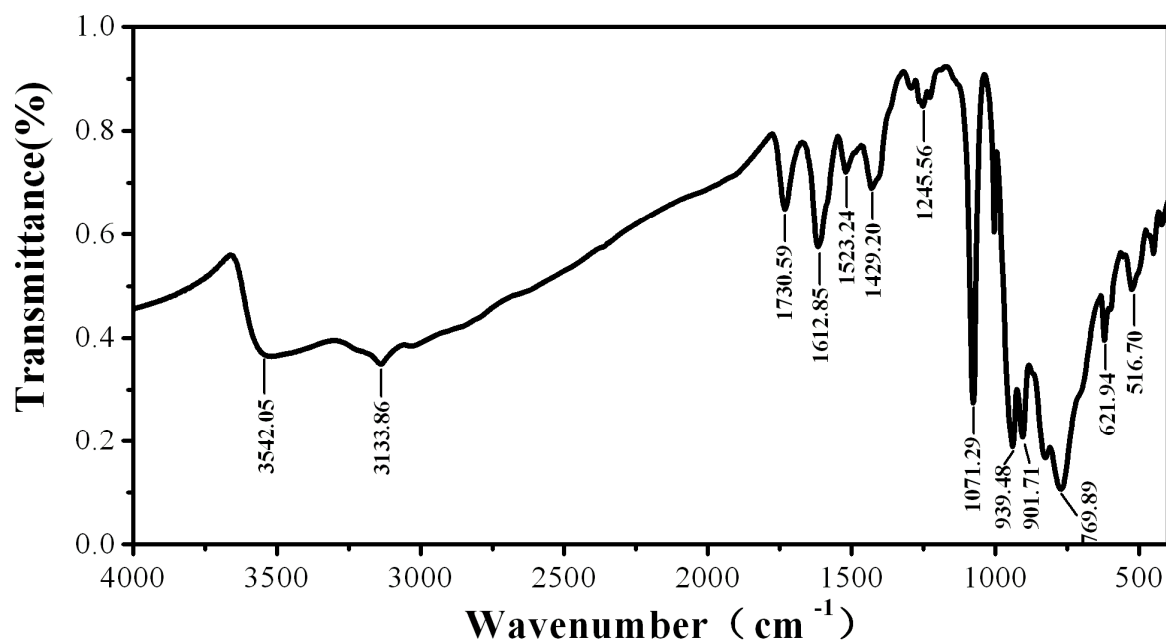

(a)

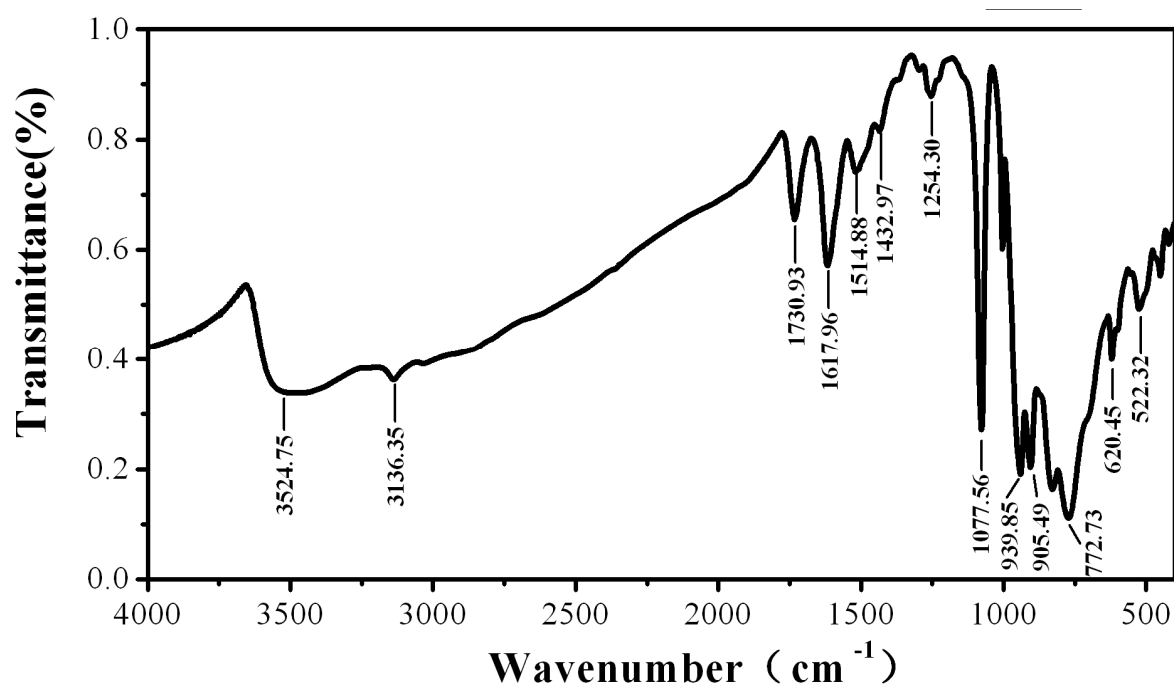

(b)

Figure S7. IR spectrum for compounds **1a** and **1b**

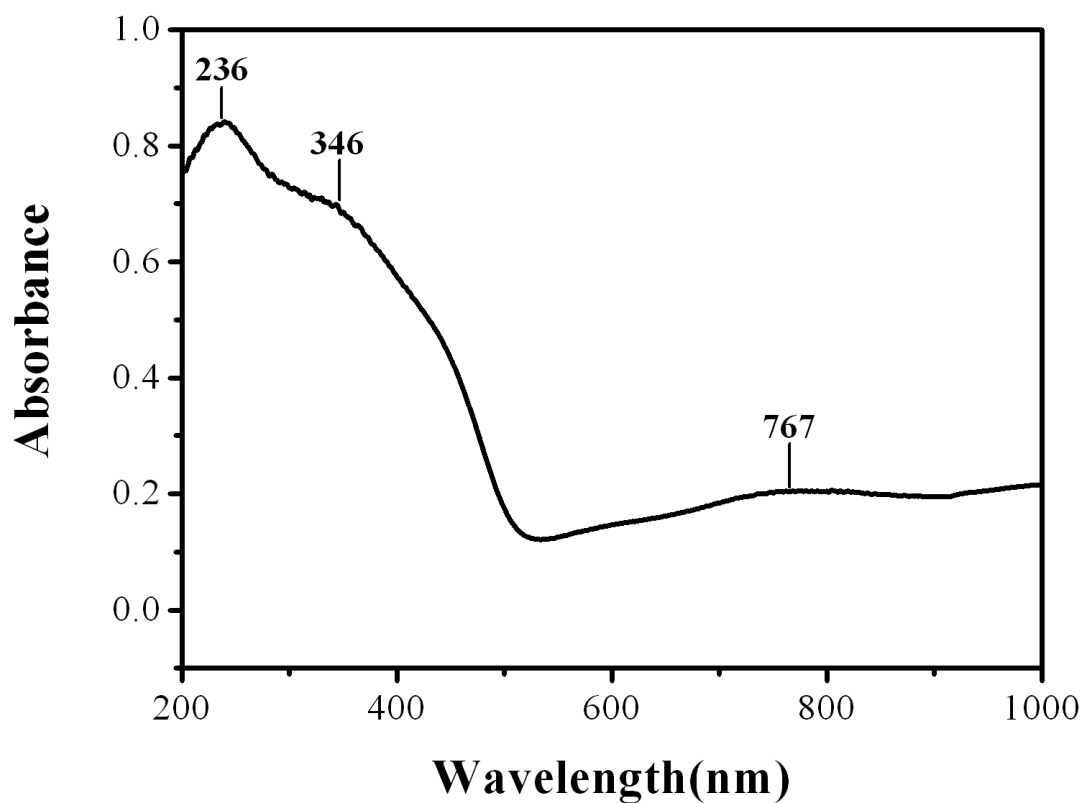

**Figure S8.** The UV-Vis spectrum for compounds **1a** in the solid state.

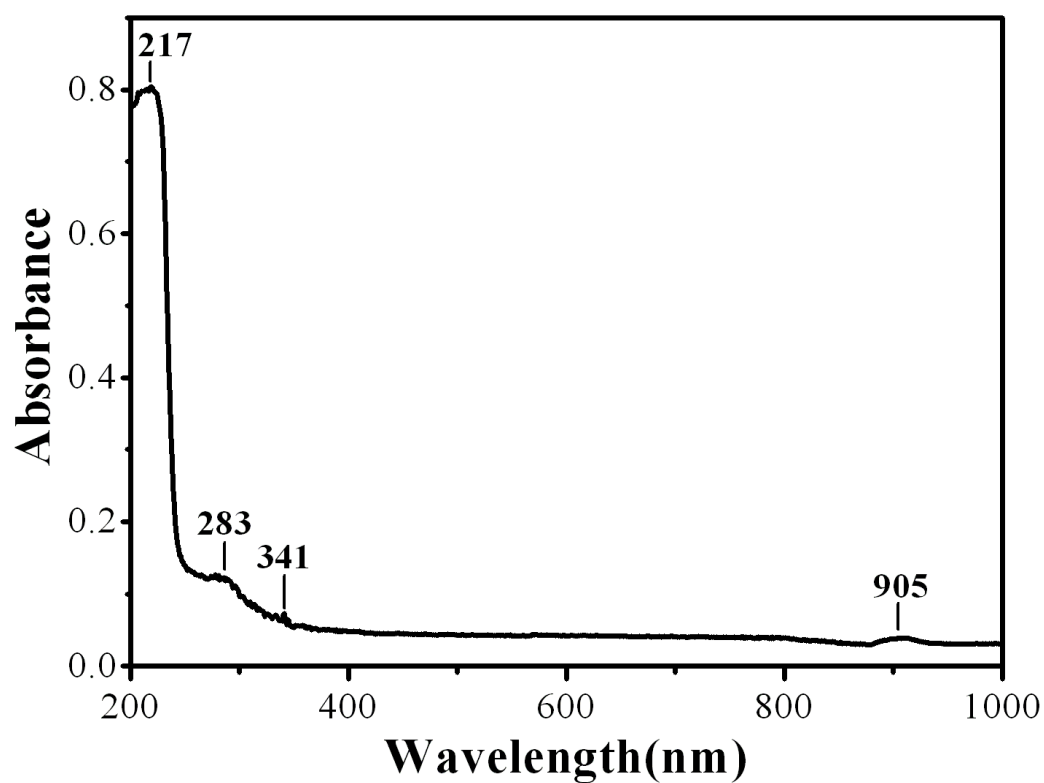

**Figure S9.** The UV-Vis spectrum for L-histidine in the solid state.



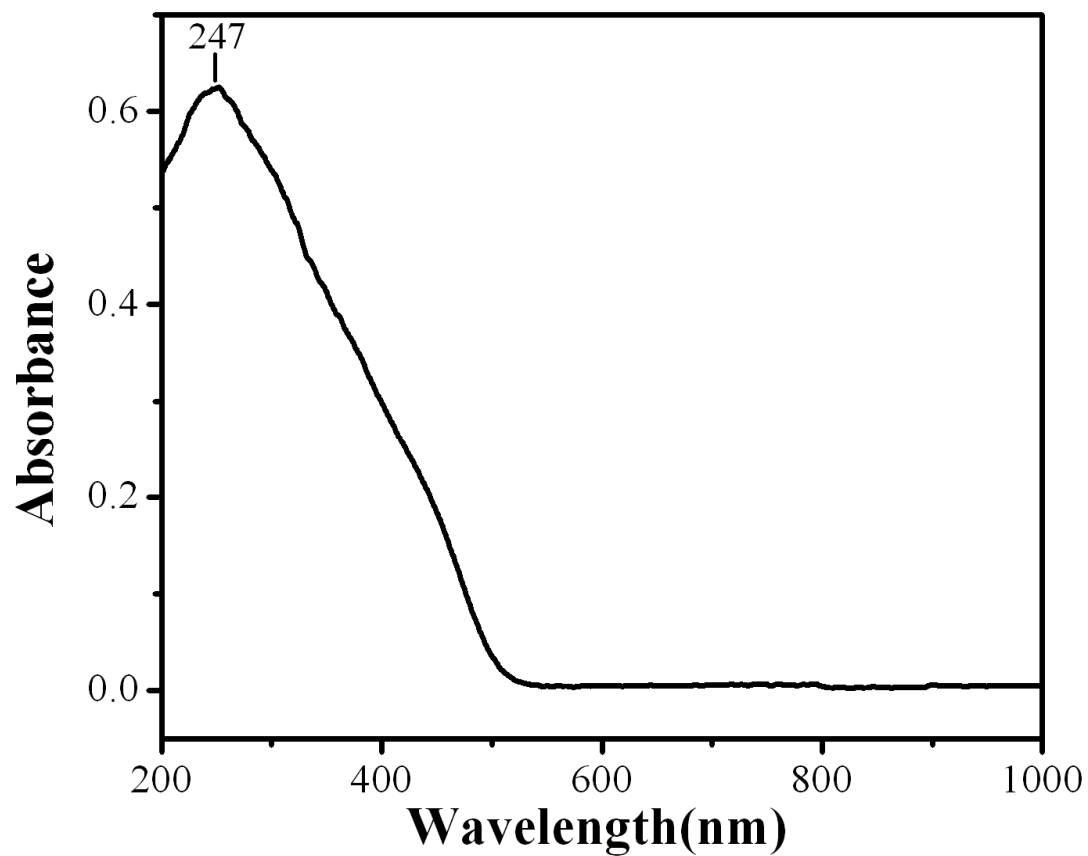

**Figure S10.** The UV-Vis spectrum for polyoxoanion  $[P_2Mo_{18}O_{62}]^{6-}$  in the solid state.

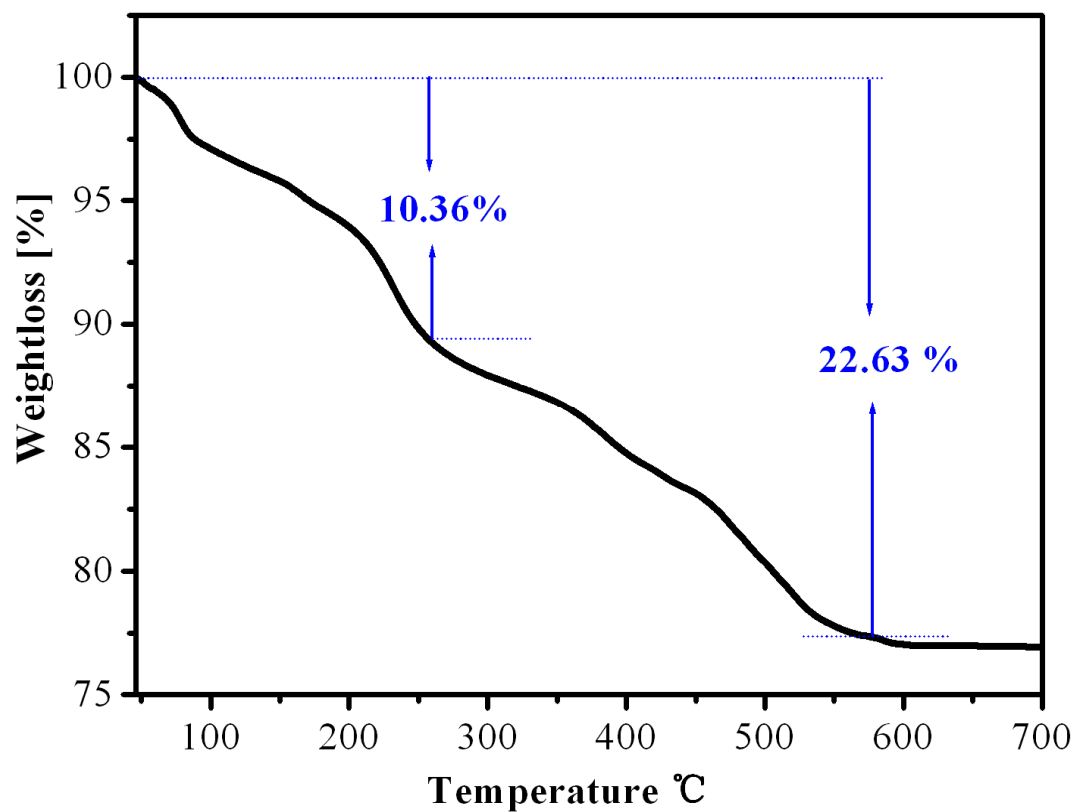

**Figure S11.** The TG curve of compound **1** exhibits two weight loss stages in the temperature ranges 46-570°C, corresponding to the loss of coordinated water and histidine molecules respectively. The whole weight loss (22.63%) is in good agreement with the calculated value (22.93%).

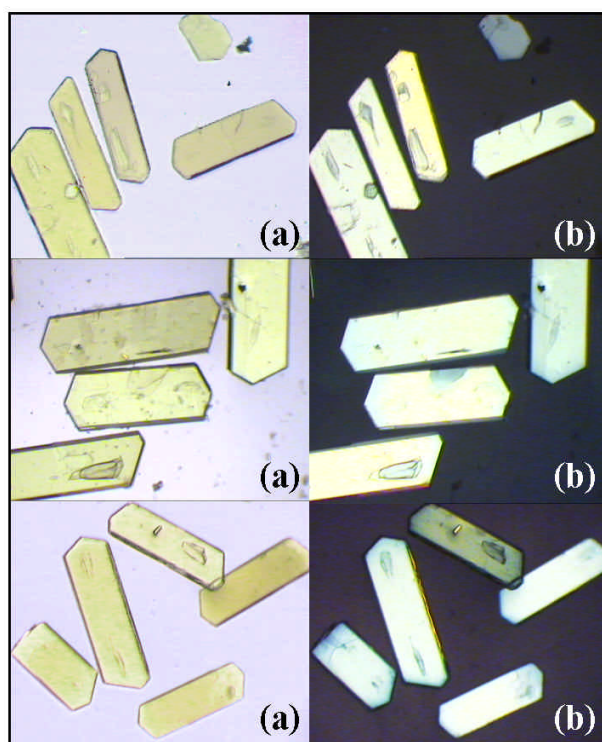

**Figure S12.** The polarizing optical micrographs of compound **1a**. (a) The bright field images of compound **1a** crystals; (b) The dark field images of compound **1a** crystals.

**Table S1** Selected H-bonding for compound **1a** and **1b**

| Compound <b>1a</b> |       | Compound <b>1b</b> |       |
|--------------------|-------|--------------------|-------|
| O(20)-H(1A)        | 2.44  | O(55)-H(9C)        | 2.483 |
| H(18A)-O(35)       | 2.517 | O(59)-H(1A)        | 2.553 |
| O(35)-H(5B)        | 2.526 | H(16A)-O(55)       | 2.554 |
| O(14)-H(11A)       | 2.531 | O(45)-H(17B)       | 2.567 |
| O(45)-H(2B)        | 2.531 | H(6A)-O(4)         | 2.569 |
| O(20)-H(3A)        | 2.569 | O(59)-H(6B)        | 2.586 |
| H(18A)-O(37)       | 2.598 | O(33)-H(6B)        | 2.607 |
| O(22)-H(2A)        | 2.598 | O(61)-H(17A)       | 2.608 |
| O(24)-H(5A)        | 2.599 | O(57)-H(14A)       | 2.628 |
| H(8B)-O(30)        | 2.617 | H(2A)-O(51)        | 2.661 |

|              |       |              |       |
|--------------|-------|--------------|-------|
| O(37)-H(7B)  | 2.673 | O(25)-H(5B)  | 2.7   |
| O(11)-H(8B)  | 2.676 | O(50)-H(16A) | 2.702 |
| O(35)-H(9A)  | 2.679 | O(55)-H(9A)  | 2.707 |
| O(19)-H(2C)  | 2.693 | O(33)-H(5A)  | 2.711 |
| O(20)-H(1C)  | 2.693 | H(2A)-O(18)  | 2.715 |
| O(30)-H(6B)  | 2.696 | O(56)-H(91A) | 2.729 |
| H(7A)-O(1)   | 2.706 | O(59)-H(31A) | 2.731 |
| O(61)-H(3A)  | 2.706 | H(9B)-O(32)  | 2.737 |
| O(37)-H(7A)  | 2.735 | H(1A)-O(62)  | 2.752 |
| H(1B)-O(60)  | 2.751 | O(33)-H(5B)  | 2.762 |
| O(55)-H(2B)  | 2.769 | O(51)-H(2C)  | 2.769 |
| H(5B)-O(58)  | 2.792 | O(56)-H(14A) | 2.782 |
| H(9B)-O(32)  | 2.804 | O(36)-H(17B) | 2.786 |
| O(1)-H(15A)  | 2.83  | O(21)-H(15A) | 2.805 |
| O(8)-H(4D)   | 2.837 | H(9C)-O(32)  | 2.814 |
| O(37)-H(9A)  | 2.854 | O(34)-H(6A)  | 2.821 |
| O(54)-H(8A)  | 2.855 | O(25)-H(7A)  | 2.839 |
| O(61)-H(6A)  | 2.855 | O(27)-H(8B)  | 2.843 |
| O(47)-H(6A)  | 2.86  | O(16)-H(31A) | 2.849 |
| O(26)-H(11A) | 2.862 | O(47)-H(2B)  | 2.859 |
| O(60)-H(1A)  | 2.866 | O(33)-H(31A) | 2.866 |
| H(9A)-O(8)   | 2.87  | O(59)-H(2A)  | 2.871 |
| H(14A)-O(48) | 2.871 | H(1A)-O(13)  | 2.874 |
| O(35)-H(8B)  | 2.873 | H(2B)-O(9)   | 2.88  |
| O(25)-H(8A)  | 2.877 | O(16)-H(3B)  | 2.881 |
| O(18)-H(1C)  | 2.89  | O(22)-H(31A) | 2.886 |
| H(5A)-O(31)  | 2.91  | H(14A)-O(37) | 2.901 |
| O(25)-H(4C)  | 2.918 | O(47)-H(3C)  | 2.911 |
| H(5B)-O(7)   | 2.919 | H(9A)-O(63)  | 2.922 |
| O(17)-H(6A)  | 2.923 | O(36)-H(8C)  | 2.943 |
| O(55)-H(3B)  | 2.94  | H(15A)-O(50) | 2.956 |
| H(2C)-O(47)  | 2.943 | H(15A)-O(45) | 2.96  |
| O(45)-H(6A)  | 2.962 | H(15A)-O(3)  | 2.964 |
| H(18A)-O(24) | 2.964 | H(2C)-O(41)  | 2.982 |
| O(4)-H(6A)   | 2.976 | H(9B)-O(63)  | 2.988 |
| O(45)-H(3A)  | 3.004 | O(55)-H(8C)  | 2.999 |
